---

# Adolescents' awareness of cancer risk factors and associations with health-related behaviours

Richard G. Kyle\*, Avril Nicoll, Liz Forbat and Gill Hubbard

Cancer Care Research Centre, School of Nursing, Midwifery and Health, University of Stirling,  
Stirling FK9 4LA, UK.

\*Correspondence to: R. G. Kyle. E-mail: richard.kyle@stir.ac.uk

Received on August 8, 2012; accepted on March 24, 2013

---

## Abstract

**Increasing adolescents' awareness of the contribution of modifiable lifestyle factors to cancer risk may influence life-long patterns of healthy behaviour. However, little is known about adolescents' awareness of cancer risk factors and the effectiveness of awareness-raising interventions. This study assessed adolescents' cancer awareness and the effectiveness of an existing cancer-specific school-based intervention delivered by Teenage Cancer Trust. The Cancer Awareness Measure was completed by 478 adolescents (male: 250, 52.3%) aged 11–17 years (mean: 13.8, standard deviation: 1.24) in four UK schools; 422 adolescents provided paired data 2 weeks before and 2 weeks after the intervention delivered in 3 schools, and twice 4 weeks apart in the fourth (control) school. Adolescents recognized on average 4.4 (of 11) cancer risk factors. With the exception of smoking, adolescents' awareness of cancer risk factors was low. Awareness significantly increased after the intervention (4.6–5.7,  $P < 0.001$ ). There was no significant change in the control school. Intervention effect was greater among females. This educational intervention is an effective way to raise adolescents' awareness of cancer risk factors. However, further cross-sectional and experimental studies are required to definitively assess adolescents' awareness of cancer risk factors and the effectiveness of this educational intervention.**

## Introduction

Awareness of the contribution of modifiable risk factors to the onset of disease is a necessary precursor to the promotion of positive health-related behaviours (HRBs) and as such is a public health priority [1]. It is conservatively estimated that two in five cancers (43%) in the United Kingdom can be attributed to lifestyle factors [2]. However, a nationally representative study of British adults using the recently developed Cancer Awareness Measure (CAM) found that awareness of known cancer risk factors among British adults was poor, especially for modifiable factors including alcohol use, physical activity, dietary factors and human papillomavirus (HPV) infection [3]. On average adults recognized 4.9 (out of 11) cancer risk factors [3]. Although adult awareness of cancer risk factors has been benchmarked [3], an equivalent study with adolescents has not yet been conducted.

Cancer is rare in teenagers and young adults aged 15–24, accounting for around 2000 (0.6%) cancer registrations in the United Kingdom annually [4]. Although few of these diagnoses can be attributed to lifestyle factors, providing adolescents with information about increased cancer risk associated with certain behaviours may be one way to encourage protective behaviours to provide the foundation for a healthy adulthood. Adolescence brings significant physical, psychological and social development [5]. Risk-taking behaviour and susceptibility to social influence

increase [6] at a time when young people are becoming more independent in decision making and action [7]. Initiation and persistence of risk behaviour is influenced by adolescents' perception of the conditional risk associated with specific behaviours [8], as well as understanding of the potential short-term and long-term health consequences associated with such behaviours [9]. Interventions which address adolescents' risk awareness may therefore be particularly useful and influence HRBs in adolescence and adulthood [10]. However, little is known about British adolescents' awareness of cancer risk factors.

Research conducted outside the United Kingdom indicates that many adolescents are aware that sun exposure is a risk factor but few are aware of the association between HPV infection and cervical cancer. An Italian study of students (aged 15–19 years) found that 66% believed that sun exposure and 59% believed that sunburn increased skin cancer risk [11], whereas a Greek study of adolescents (aged 15–18 years) found higher levels of awareness of the association between sun exposure and skin cancer risk (89%) [12]. Awareness of risk factors associated with breast cancer was low among Turkish students, and the most widely known were personal (69%) and family (67%) history of the disease [13]. A nationally representative study of Australian adolescents (median age 15 and 17 years) found that 25% knew about the association between HPV infection and cervical cancer, yet 72% were unsure [14].

There is a need to concurrently examine adolescents' awareness of cancer risk factors and associations with linked HRBs to inform interventions that seek to increase risk awareness. Our aims were therefore to (i) address the relative lack of evidence by providing an initial indication of adolescents' awareness of known cancer risks; (ii) enable preliminary comparison between adolescents' awareness of cancer risk factors and benchmark data for British adults; (iii) evaluate the effectiveness of an existing cancer-specific educational intervention delivered in UK schools by Teenage Cancer Trust.

---

## Methods

---

### Study design

The study reported in this article comprised two discrete parts. First, a cross-sectional analysis of adolescents' cancer awareness in four UK schools was conducted. Further details about the design and additional findings of this analysis are published elsewhere [15]. Second, in the same four UK schools, pre-test–post-test analysis was conducted to assess the effectiveness of an educational intervention delivered by Teenage Cancer Trust. Thus, data collected for cross-sectional analysis of adolescents' awareness of cancer risk factors provided the baseline measures for assessment of changes in awareness following delivery of the intervention. This pragmatic approach was adopted to facilitate the first UK cross-sectional study of adolescents' cancer awareness and initial evaluation of the effectiveness of an existing educational intervention to inform the development of future larger scale intervention studies. This article, therefore, reports both cross-sectional and pre-test–post-test analysis of adolescents' awareness of cancer risk factors by gender and linked HRBs.

### Data collection

Data were collected from adolescents aged 11–17 years, recruited from four schools in England and Scotland between August and October 2011. Schools with an existing relationship with Teenage Cancer Trust were purposively sampled to maximize geographic and age distribution and to ensure both male and female adolescents were included (i.e. single-sex schools were excluded), as there are known differences in their health behaviours [16]. Therefore, the sampling strategy incorporated elements of both convenience and purposive sampling. Consequently, none of the schools that were approached to participate in the study refused to participate.

Data were collected during a single day 2 weeks before ( $T_0$ ) and again 2 weeks after ( $T_1$ ) the intervention in three schools, and twice 4 weeks apart in the fourth (control) school. There were

**Table I.** Study response rates

| School (English Education System Year) | School roll (SR)<br><i>n</i> | Study participants |           |          |           |               |
|----------------------------------------|------------------------------|--------------------|-----------|----------|-----------|---------------|
|                                        |                              | $T_0$              |           | $T_1$    |           |               |
|                                        |                              | <i>n</i>           | % (of SR) | <i>n</i> | % (of SR) | % (of $T_0$ ) |
| A (Year 11)                            | 175                          | 155                | 88.6      | 124      | 70.9      | 80.0          |
| B (Year 10)                            | 174                          | 156                | 89.7      | 138      | 79.3      | 88.5          |
| C (Year 12)                            | 44                           | 29                 | 65.9      | 28       | 63.6      | 96.6          |
| D (Year 8)                             | 165                          | 138                | 83.6      | 132      | 80.0      | 95.7          |
| Total                                  | 558                          | 478                | 85.7      | 422      | 75.6      | 88.3          |

558 adolescents on the school roll, of whom 478 (86%) provided data at  $T_0$  and 422 (76%) provided data at both  $T_0$  and  $T_1$  (Table I).

### Intervention

Currently, cancer awareness education is not a statutory component of curricula delivered in UK schools. However, the charity Teenage Cancer Trust have provided cancer awareness education in UK schools since 1995 and currently deliver an educational intervention, ‘Let’s talk about it’, in approximately 10% of UK schools each year ( $n = 600$ ). Yet, there has been no previous evaluation of the effectiveness of this existing educational intervention to inform wider roll-out or integration into school curricula.

‘Let’s talk about it’ is an hour-long oral presentation delivered by a single Teenage Cancer Trust educator to adolescents in a classroom or assembly setting. Each presentation includes the same agreed content to ensure consistency and intervention fidelity between educators; although presentation style may vary by educator, and in response to the needs of the audience. Intervention content is linked to outcomes from the ‘Health and Well-being’ section of the Curriculum for Excellence in Scotland, such as ‘assess and manage risk and understand the impact of risk-taking behaviour’ and ‘participate in a wide range of activities which promote a healthy lifestyle’ [17], and to key concepts for Personal, Social, Health and Economic Education in England and Wales, including ‘recognising that healthy lifestyles, and the wellbeing of self and

others, depend on information and making responsible choices’ and ‘understanding risk in both positive and negative terms and understanding that individuals need to manage risk to themselves and others in a range of situations’ [18]. Hence, the presentation includes information about known cancer risk factors as well as messages to encourage young people to adopt healthy lifestyle habits, and specifically, healthy eating, physical exercise and avoiding risk behaviours such as smoking and alcohol consumption. Further details about the intervention are available online (<http://teenagecancertrust.myresourcecloud.net/>).

‘Let’s talk about it’ was delivered in three schools which were also provided with Teenage Cancer Trust booklets designed specifically for adolescents after delivery. A fourth (control) school did not receive the intervention or booklets. There were no additional cancer awareness raising initiatives in place in any of the schools at the time of the study.

### Survey instrument

Teachers administered a paper questionnaire to a whole class. Students were asked to complete the questionnaire in complete silence but were informed that it was not a test. Teachers encouraged students to complete as much of the questionnaire as they could. Students were allowed as much time as they needed within the 55-min lesson, although most completed the questionnaire within 20 min. In the three intervention schools, the questionnaire was completed 2 weeks before ( $T_0$ ) and again by the same adolescents 2 weeks after ( $T_1$ ) the intervention.

In the control school, the questionnaire was completed on two occasions 4 weeks apart ( $T_0$  and  $T_1$ ). The instrument incorporated the CAM [19], questions from the cross-national Health Behaviour in School-aged Children (HBSC) survey [16] and sociodemographic questions. Validity testing of the survey instrument prior to its use with adolescents in this study is described in detail elsewhere [15].

### *Cancer awareness*

Adolescents' awareness of known cancer risk factors was assessed through a closed question from the CAM: 'These are some of the things that can increase a person's chance of developing cancer. How much do you agree that each of these can increase a person's chance of developing cancer?' Eleven cancer risk factors were listed in this order: 'smoking any cigarettes at all'; 'exposure to another person's smoke'; 'drinking more than one unit of alcohol a day'; 'eating less than five portions of fruit and vegetables a day'; 'eating red or processed meat once a day or more'; 'being overweight (BMI over 25)'; 'getting sunburnt more than once as a child'; 'being over 70 years old'; 'having a close relative with cancer'; 'infection with HPV'; 'doing less than 30 minutes of moderate physical activity five times a week'. Responses ranged from 'strongly disagree' to 'strongly agree' on a five-point Likert scale. For analysis, responses were dichotomized (i.e. 'strongly agree'/'agree' versus 'not sure'/'disagree'/'strongly disagree'). 'Agree' and 'strongly agree' responses were combined and summed to create an overall risk factor score (out of 11).

### *Health-related behaviours*

Adolescents' HRBs were assessed using questions from the HBSC survey. Categories in the following variables were dichotomized for analysis using HBSC methodology [16]: alcohol consumption (weekly/less often); current smoker (yes/no); sunbed user (yes/no); sun protection while (i) sunbathing and (ii) outdoors (yes/no); moderate physical activity outside school hours [7] (four or more/less than four times a week).

### *Sociodemographic characteristics*

Sociodemographic questions were included to gather data on age, gender, ethnicity (using census categories) and cancer experience (i.e. whether the student, a relative or friend had been diagnosed with cancer).

### **Statistical analysis**

Descriptive statistics were calculated for sociodemographic variables, CAM and HBSC items.

### *Cross-sectional analysis*

Cross-sectional analyses were conducted using data collected at  $T_0$ . Pearson's chi-square ( $\chi^2$ ) tests were used to assess: (i) differences in sociodemographic characteristics and HRBs between the intervention and control groups and (ii) associations between awareness of cancer risk factors and (i) gender and (ii) linked HRBs (e.g. current smoking status and awareness of smoking as a cancer risk factor). Independent samples *t*-tests were used to examine differences in the mean number of cancer risk factors recognized by gender.

### *Pre-test–post-test analysis*

Pre-test–post-test analysis was conducted using data collected at  $T_0$  and  $T_1$ . McNemar's chi-square ( $\chi^2_M$ ) tests for matched paired categorical data were used to examine change in recognition of known cancer risk factors within the intervention and control schools between  $T_0$  and  $T_1$  by gender and linked HRBs (e.g. agreement that smoking was a cancer risk factor among smokers and non-smokers). In addition, Pearson's chi-square ( $\chi^2$ ) tests were used to assess differences in recognition at  $T_0$  and  $T_1$  by gender. Paired samples *t*-tests were used to examine differences in the mean number of cancer risk factors recognized between  $T_0$  and  $T_1$  for all adolescents and by gender.

Data were analysed using SPSS 19.0. Significance tests were two-sided;  $P < 0.05$  was considered statistically significant.

### **Ethical considerations**

Approval for the study was obtained from the Research Ethics Committee in the School of

Nursing, Midwifery and Health, University of Stirling. Parents/carers were informed of the study by letter and could opt their child out of the research, although none did. Written informed consent was obtained from each adolescent before completion of the questionnaire.

## Results

### Sample

The sample included 478 adolescents (male:  $n = 250$ , 52.3%) aged 11–17 years [mean = 13.8, standard deviation (SD) = 1.24], of whom 422 (88%) provided paired data (male:  $n = 221$ , 52.4%; mean age = 13.8, SD = 1.26). HRBs of adolescents in this study were comparable with those of similarly aged Scottish and English adolescents reported in the nationally representative HBSC surveys [5, 16]. Participants' sociodemographic characteristics and HRBs are provided in Table II.

### Cross-sectional analysis

#### *Recognition of cancer risk factors*

The mean number of cancer risk factors recognized was 4.41 (SD = 2.08) of 11. Most adolescents (88%) agreed that smoking was a cancer risk factor, followed by second-hand smoke (60%) and being overweight (58%). Only half agreed that sun exposure (52%) or drinking alcohol (47%) increased the chance of developing cancer. A third (31%) agreed that HPV infection was a known risk factor, and a quarter (26%) that low levels of physical activity increased cancer risk. Awareness of diet-related factors was poor; only 15% of adolescents agreed that eating red or processed meat, and 7% that low fruit and vegetable consumption, increased cancer risk. Awareness of non-modifiable cancer risk factors was also low; two-fifths (41%) agreed that having a close relative and one-fifth (22%) that being aged over 70 increased the chance of developing cancer (Table III).

#### *Recognition of cancer risk factors by gender*

There was no statistically significant difference in the mean number of cancer risk factors recognized

between male and female adolescents [male: 4.41 (SD = 2.15) versus female: 4.41 (SD = 2.01);  $t(476) = 0.001$ ,  $P = 1.000$ ]. However, males were statistically significantly more likely to agree that second-hand smoke, low levels of physical activity and being aged over 70 were cancer risk factors. Females were significantly more likely to agree that HPV infection and family history were cancer risk factors (Table III).

#### *Recognition of cancer risk factors by linked health-related behaviours*

Adolescents who participated in physical activity four or more times a week were significantly more likely to agree that low levels of physical activity increased cancer risk [females:  $\chi^2(1, 220) = 5.06$ ,  $P = 0.025$ ; males:  $\chi^2(1, 235) = 6.45$ ,  $P = 0.011$ ]. In addition, males who participated in physical activity four or more times a week were significantly more likely to agree that being overweight [ $\chi^2(1, 232) = 4.73$ ,  $P = 0.030$ ] increased cancer risk.

Females who reported using sunbeds were significantly more likely to agree that sun exposure was a known cancer risk factor [ $\chi^2(1, 224) = 4.79$ ,  $P = 0.029$ ] than females who did not use sunbeds.

There were no statistically significant associations between agreement with cancer risk factors and linked HRBs for either gender for smoking/second-hand smoke versus current smoking status; drinking more than one unit of alcohol a day versus weekly alcohol consumption; sun exposure versus use of sunscreen while sunbathing or outdoors.

### Pre-test–post-test analysis

#### *Recognition of cancer risk factors*

Adolescents recognized on average 1.1 more cancer risk factors after the intervention, and this increase was statistically significant [4.6 (SD = 2.12) to 5.7 (SD = 2.69);  $t(289) = -6.95$ ,  $P < 0.001$ ]. In the control school, there was no significant change [4.0 (SD = 1.98) to 3.7 (SD = 2.24);  $t(131) = 1.64$ ,  $P = 0.104$ ].

Awareness of 9 (of 11) cancer risk factors increased after the intervention, and these increases were statistically significant for 7. The greatest

**Table II.** Sample sociodemographic characteristics and health-related behaviours

|                                        | Cross-sectional analysis |        | Pre-test–post-test analysis |        |                                |        | Significance<br>( <i>P</i> ) |                           |                              |
|----------------------------------------|--------------------------|--------|-----------------------------|--------|--------------------------------|--------|------------------------------|---------------------------|------------------------------|
|                                        | Total ( <i>n</i> = 478)  |        | Total ( <i>n</i> = 422)     |        | Intervention ( <i>n</i> = 290) |        |                              | Control ( <i>n</i> = 132) |                              |
|                                        | <i>n</i>                 | (%)    | <i>n</i>                    | (%)    | <i>n</i>                       | (%)    |                              | <i>n</i>                  | (%)                          |
| Sociodemographic characteristics       |                          |        |                             |        |                                |        |                              |                           |                              |
| Gender                                 |                          |        |                             |        |                                |        |                              |                           |                              |
| Male                                   | 250                      | 52.3   | 221                         | 52.4   | 162                            | 55.9   | 59                           | 44.7                      | <b>0.033<sup>a</sup></b>     |
| Female                                 | 228                      | 47.7   | 201                         | 47.6   | 128                            | 44.1   | 73                           | 55.3                      |                              |
| Age, mean (SD)                         | 13.8                     | (1.24) | 13.8                        | (1.26) | 14.5                           | (0.72) | 12.2                         | (0.40)                    | <b>&lt;0.001<sup>b</sup></b> |
| Ethnicity                              |                          |        |                             |        |                                |        |                              |                           |                              |
| White                                  | 438                      | 91.6   | 386                         | 91.5   | 261                            | 90.0   | 125                          | 94.7                      | 0.193 <sup>a</sup>           |
| Other ethnic backgrounds               | 32                       | 6.7    | 30                          | 7.1    | 23                             | 7.9    | 7                            | 5.3                       |                              |
| Missing                                | 8                        | 1.7    | 6                           | 1.4    | 6                              | 2.1    | 0                            | 0                         |                              |
| Knew someone with cancer               |                          |        |                             |        |                                |        |                              |                           |                              |
| Yes                                    | 292                      | 61.1   | 255                         | 60.4   | 179                            | 61.7   | 76                           | 57.6                      | 0.644 <sup>a</sup>           |
| No                                     | 149                      | 31.2   | 131                         | 31.0   | 88                             | 30.3   | 43                           | 32.6                      |                              |
| Do not wish to answer                  | 37                       | 7.7    | 36                          | 8.5    | 23                             | 7.9    | 13                           | 9.8                       |                              |
| School (region)                        |                          |        |                             |        |                                |        |                              |                           |                              |
| A (Scottish Highlands)                 | 155                      | 32.4   | 124                         | 29.4   | 124                            | 42.8   | —                            | —                         |                              |
| B (South West England)                 | 156                      | 32.6   | 138                         | 32.7   | 138                            | 47.6   | —                            | —                         |                              |
| C (English East Midlands)              | 29                       | 6.1    | 28                          | 6.6    | 28                             | 9.7    | —                            | —                         |                              |
| D (North West England)                 | 138                      | 28.9   | 132                         | 31.3   | —                              | —      | 132                          | 100.0                     |                              |
| Country                                |                          |        |                             |        |                                |        |                              |                           |                              |
| Scotland                               | 155                      | 32.4   | 124                         | 29.4   | 124                            | 42.8   | —                            | —                         |                              |
| England                                | 323                      | 67.6   | 298                         | 70.6   | 166                            | 57.2   | 132                          | 100.0                     |                              |
| Health-related behaviours              |                          |        |                             |        |                                |        |                              |                           |                              |
| Current smoker                         |                          |        |                             |        |                                |        |                              |                           |                              |
| Yes                                    | 36                       | 7.5    | 24                          | 5.7    | 22                             | 7.6    | 2                            | 1.5                       | <b>0.013<sup>a</sup></b>     |
| No                                     | 425                      | 88.9   | 386                         | 91.5   | 261                            | 90.0   | 125                          | 94.7                      |                              |
| Missing                                | 17                       | 3.6    | 12                          | 2.8    | 7                              | 2.4    | 5                            | 3.8                       |                              |
| Weekly alcohol consumption             |                          |        |                             |        |                                |        |                              |                           |                              |
| Yes                                    | 72                       | 15.1   | 60                          | 14.2   | 48                             | 16.6   | 12                           | 9.1                       | 0.054 <sup>a</sup>           |
| No                                     | 392                      | 82.0   | 352                         | 83.4   | 238                            | 82.1   | 114                          | 86.4                      |                              |
| Missing                                | 14                       | 2.9    | 10                          | 2.4    | 4                              | 1.4    | 6                            | 4.5                       |                              |
| Sunbed use                             |                          |        |                             |        |                                |        |                              |                           |                              |
| Yes                                    | 50                       | 10.5   | 46                          | 10.9   | 26                             | 9.0    | 20                           | 15.2                      | <b>0.035<sup>a</sup></b>     |
| No                                     | 411                      | 86.0   | 363                         | 86.0   | 260                            | 89.7   | 103                          | 78.0                      |                              |
| Missing                                | 17                       | 3.6    | 13                          | 3.1    | 4                              | 1.4    | 9                            | 6.8                       |                              |
| Sun protection while sunbathing        |                          |        |                             |        |                                |        |                              |                           |                              |
| No suncream/sunscreen                  | 52                       | 10.9   | 47                          | 11.1   | 36                             | 12.4   | 11                           | 8.3                       | 0.343 <sup>a</sup>           |
| Uses suncream/sunscreen                | 307                      | 64.2   | 268                         | 63.5   | 187                            | 64.5   | 81                           | 61.4                      |                              |
| Non-sunbather                          | 100                      | 20.9   | 92                          | 21.8   | 61                             | 21.0   | 31                           | 23.5                      |                              |
| Missing                                | 19                       | 4.0    | 15                          | 3.6    | 6                              | 2.1    | 9                            | 6.8                       |                              |
| Sun protection while outdoors          |                          |        |                             |        |                                |        |                              |                           |                              |
| No suncream                            | 176                      | 36.8   | 153                         | 36.3   | 116                            | 40.0   | 37                           | 28.0                      | <b>0.042<sup>a</sup></b>     |
| Uses suncream                          | 284                      | 59.4   | 255                         | 60.4   | 169                            | 58.3   | 86                           | 65.2                      |                              |
| Missing                                | 18                       | 3.8    | 14                          | 3.3    | 5                              | 1.7    | 9                            | 6.8                       |                              |
| Moderate to vigorous physical activity |                          |        |                             |        |                                |        |                              |                           |                              |
| Four or more times a week              | 174                      | 36.4   | 149                         | 35.3   | 87                             | 30.0   | 62                           | 47.0                      | <b>&lt;0.001<sup>a</sup></b> |
| Less than four times a week            | 286                      | 59.8   | 259                         | 61.4   | 195                            | 67.2   | 64                           | 48.5                      |                              |
| Missing                                | 18                       | 3.8    | 14                          | 3.3    | 8                              | 2.8    | 6                            | 4.5                       |                              |

Statistically significant differences between intervention and control schools at the  $P < 0.05$  level are emboldened.

<sup>a</sup>Pearson's chi-square test. <sup>b</sup>Independent samples *t*-test.

**Table III.** Recognition of cancer risk factors by gender at  $T_0$ 

| Cancer risk factor, % agree ( <i>n</i> ) | All ( <i>n</i> = 478) | Gender ( <i>n</i> = 478) |                          | Significance <sup>a</sup>                                    |
|------------------------------------------|-----------------------|--------------------------|--------------------------|--------------------------------------------------------------|
|                                          |                       | Male ( <i>n</i> = 250)   | Female ( <i>n</i> = 228) |                                                              |
| Smoking                                  | 87.8 (416)            | 88.2 (217)               | 87.3 (199)               | $\chi^2(1, 474) = 0.10$<br>$P = 0.757$                       |
| Second-hand smoke                        | 59.7 (283)            | <b>65.9 (162)</b>        | <b>53.1 (121)</b>        | $\chi^2(1, 474) = 8.04$<br><b><math>P = 0.005</math></b>     |
| Overweight                               | 58.4 (276)            | 58.8 (144)               | 57.9 (132)               | $\chi^2(1, 473) = 0.04$<br>$P = 0.846$                       |
| Sun exposure                             | 51.9 (245)            | 49.6 (121)               | 54.4 (124)               | $\chi^2(1, 472) = 1.09$<br>$P = 0.297$                       |
| Drinking alcohol                         | 46.5 (220)            | 43.9 (108)               | 49.3 (112)               | $\chi^2(1, 473) = 1.40$<br>$P = 0.236$                       |
| Family history <sup>b</sup>              | 41.2 (194)            | <b>32.9 (80)</b>         | <b>50.0 (114)</b>        | $\chi^2(1, 471) = 14.16$<br><b><math>P &lt; 0.001</math></b> |
| HPV infection                            | 31.4 (148)            | <b>24.5 (60)</b>         | <b>38.8 (88)</b>         | $\chi^2(1, 472) = 11.16$<br><b><math>P = 0.001</math></b>    |
| Low exercise                             | 25.5 (120)            | <b>32.8 (80)</b>         | <b>17.6 (40)</b>         | $\chi^2(1, 471) = 14.25$<br><b><math>P &lt; 0.001</math></b> |
| Older age <sup>b</sup>                   | 21.8 (103)            | <b>27.0 (66)</b>         | <b>16.2 (37)</b>         | $\chi^2(1, 472) = 8.09$<br><b><math>P = 0.004</math></b>     |
| Eating red meat                          | 15.0 (71)             | 18.0 (44)                | 11.8 (27)                | $\chi^2(1, 472) = 3.54$<br>$P = 0.060$                       |
| Low fruit/vegetable intake               | 6.5 (31)              | 8.1 (20)                 | 4.8 (11)                 | $\chi^2(1, 474) = 2.12$<br>$P = 0.146$                       |

Statistically significant associations at the  $P < 0.05$  level are emboldened.

<sup>a</sup>Pearson's chi-square test for  $2 \times 2$  tables (i.e. Agree versus disagree/not sure for each demographic variable). <sup>b</sup>Non-modifiable risk factor.

increase was for 'being over 70 years old', followed by 'eating less than five portions of fruit and vegetables a day', 'doing less than 30 minutes of moderate physical activity five times a week' and 'eating red or processed meat' (all  $P < 0.001$ ). In the control school, there were no statistically significant changes in awareness of known cancer risk factors (Table IV).

#### Intervention effect by gender

Females showed greater increases in recognition after the intervention than males. On average females recognized 1.4 more cancer risk factors after the intervention [4.6 (SD = 1.97) to 6.0 (SD = 2.56),  $t(127) = -6.33$ ,  $P < 0.001$ ], whereas males recognized on average 0.8 more cancer risk factors [4.6 (SD = 2.24) to 5.4 (SD = 2.77),  $t(161) = -3.87$ ,  $P < 0.001$ ].

Between-groups analysis identified statistically significant gender differences in recognition before the intervention for five cancer risk factors: 'having a close relative with cancer' (male: 32.1% versus female: 56.3%;  $P < 0.001$ ), 'older age' (male: 33.3% versus female: 16.4%;  $P = 0.001$ ), 'low levels of physical activity' (male: 34.2% versus female: 18.9%;  $P = 0.004$ ), 'HPV infection' (male: 25.8% versus female: 40.2%;  $P = 0.010$ ) and 'second-hand smoke' (male: 69.8% versus female: 58.6%;  $P = 0.048$ ). After the intervention, statistically significant differences remained for two: 'HPV infection' (male: 28.0% versus female: 50.4%;  $P < 0.001$ ) and 'having a close relative with cancer' (male: 33.5% versus female: 51.2%;  $P = 0.003$ ), both of which had higher levels of agreement among female adolescents.

**Table IV.** Change in recognition of cancer risk factors after intervention

| Cancer risk factor, strongly agree/agree, % (n) | Intervention (n = 290) |                   |                  |                               | Control (n = 132) |                |            |                               |
|-------------------------------------------------|------------------------|-------------------|------------------|-------------------------------|-------------------|----------------|------------|-------------------------------|
|                                                 | T <sub>0</sub>         | T <sub>1</sub>    | Change           | Significance (P) <sup>a</sup> | T <sub>0</sub>    | T <sub>1</sub> | Change     | Significance (P) <sup>a</sup> |
| Older age                                       | <b>25.9 (74)</b>       | <b>55.2 (158)</b> | <b>29.3 (84)</b> | <b>&lt;0.001</b>              | 11.0 (14)         | 16.5 (21)      | 5.5 (7)    | 0.230                         |
| Low fruit/vegetable intake                      | <b>7.7 (22)</b>        | <b>27.5 (79)</b>  | <b>19.8 (57)</b> | <b>&lt;0.001</b>              | 3.1 (4)           | 3.1 (4)        | 0 (0)      | 1.000                         |
| Low levels of physical activity                 | <b>27.6 (78)</b>       | <b>42.4 (120)</b> | <b>14.8 (42)</b> | <b>&lt;0.001</b>              | 19.8 (25)         | 13.5 (17)      | -6.3 (-8)  | 0.169                         |
| Eating red or processed meat                    | <b>15.0 (43)</b>       | <b>26.6 (76)</b>  | <b>11.6 (33)</b> | <b>&lt;0.001</b>              | 18.1 (23)         | 13.4 (17)      | -4.7 (-6)  | 0.327                         |
| Drinking alcohol                                | <b>45.1 (129)</b>      | <b>54.5 (156)</b> | <b>9.4 (27)</b>  | <b>0.009</b>                  | 51.9 (67)         | 43.4 (56)      | -8.5 (-11) | 0.126                         |
| Sun exposure                                    | <b>55.4 (159)</b>      | <b>62.7 (180)</b> | <b>7.3 (21)</b>  | <b>0.038</b>                  | 40.6 (52)         | 45.3 (58)      | 4.7 (6)    | 0.377                         |
| Overweight                                      | <b>59.4 (170)</b>      | <b>66.4 (190)</b> | <b>7.0 (20)</b>  | <b>0.047</b>                  | 53.9 (69)         | 54.7 (70)      | 0.8 (1)    | 1.000                         |
| Second-hand smoke                               | 64.8 (186)             | 70.7 (203)        | 5.9 (17)         | 0.068                         | 51.2 (66)         | 48.8 (63)      | -2.4 (-3)  | 0.755                         |
| HPV infection                                   | 32.5 (92)              | 38.2 (108)        | 5.7 (16)         | 0.125                         | 32.0 (40)         | 28.8 (36)      | -3.2 (-4)  | 0.585                         |
| Family history                                  | 42.8 (122)             | 41.8 (119)        | -1.0 (-3)        | 0.836                         | 27.8 (35)         | 34.9 (44)      | 7.1 (9)    | 0.175                         |
| Smoking                                         | 87.5 (251)             | 86.1 (247)        | -1.4 (-4)        | 0.636                         | 86.7 (111)        | 79.7 (102)     | -7.0 (-9)  | 0.064                         |

Statistically significant changes at the  $P < 0.05$  level are emboldened.

<sup>a</sup>McNemar's chi-square test for  $2 \times 2$  tables (i.e. strongly agree/agree versus not sure/disagree/strongly disagree).

**Table V.** Recognition of cancer risk factors at T<sub>0</sub> and T<sub>1</sub> by health-related behaviours at T<sub>0</sub>

| Cancer risk factor, % (n)            | Health-related behaviours    | Intervention (n = 290) |                   |              |                               |
|--------------------------------------|------------------------------|------------------------|-------------------|--------------|-------------------------------|
|                                      |                              | T <sub>0</sub>         | T <sub>1</sub>    | Change       | Significance (P) <sup>a</sup> |
| Sunburnt                             | Sunbed user                  |                        |                   |              |                               |
|                                      | Yes                          | 53.8 (14)              | 69.2 (18)         | 15.4         | 0.219                         |
|                                      | No                           | 55.4 (143)             | 62.8 (162)        | 7.4          | 0.050                         |
|                                      | Use sunscreen while outdoors |                        |                   |              |                               |
|                                      | No                           | 55.2 (64)              | 61.2 (71)         | 6.0          | 0.311                         |
|                                      | Yes                          | <b>55.1 (92)</b>       | <b>64.7 (108)</b> | <b>9.6</b>   | <b>0.044</b>                  |
| Suncream while sunbathing            | No                           | 55.6 (20)              | 61.1 (22)         | 5.5          | 0.774                         |
|                                      | Yes                          | 56.7 (106)             | 64.2 (120)        | 7.5          | 0.098                         |
| Smoking                              | Smoker                       |                        |                   |              |                               |
|                                      | Yes                          | <b>90.9 (20)</b>       | <b>63.6 (14)</b>  | <b>-27.3</b> | <b>0.031</b>                  |
|                                      | No                           | 87.3 (227)             | 88.1 (229)        | 0.8          | 0.864                         |
| Second-hand smoke                    | Smoker                       |                        |                   |              |                               |
|                                      | Yes                          | 50.0 (11)              | 50.0 (11)         | 0            | 1.000                         |
|                                      | No                           | 66.2 (172)             | 71.9 (187)        | 5.7          | 0.082                         |
| Alcohol consumption                  | Alcohol consumption          |                        |                   |              |                               |
|                                      | Weekly                       | 43.8 (21)              | 50.0 (24)         | 6.2          | 0.629                         |
|                                      | Less often                   | <b>45.5 (107)</b>      | <b>55.7 (131)</b> | <b>10.2</b>  | <b>0.012</b>                  |
| Low levels of physical activity (PA) | Moderate to vigorous PA      |                        |                   |              |                               |
|                                      | <4 times a week              | <b>23.3 (44)</b>       | <b>40.2 (76)</b>  | <b>16.9</b>  | <b>&lt;0.001</b>              |
|                                      | ≥4 times a week              | 39.1 (34)              | 48.3 (42)         | 9.2          | 0.215                         |

Statistically significant changes at the  $P < 0.05$  level are emboldened.

<sup>a</sup>McNemar's chi-square test for  $2 \times 2$  tables.

### *Intervention effect by linked health-related behaviours*

Recognition that low levels of physical activity is a cancer risk factor significantly increased after the intervention among adolescents with lower levels of physical activity ( $P < 0.001$ ).

Recognition of alcohol consumption as a risk factor significantly increased among adolescents with lower levels of alcohol consumption ( $P = 0.012$ ). Recognition of the cancer risk posed by sun exposure as a child significantly increased among adolescents who used sunscreen while outdoors ( $P = 0.044$ ).

Awareness of smoking as a cancer risk factor significantly decreased among smokers ( $P = 0.031$ ; Table V).

---

## Discussion

---

Cross-sectional analysis showed adolescents' awareness of cancer risk factors was low, particularly for dietary factors. Adolescents in this study had comparable cancer awareness to the British population, recognizing on average 4.4 versus 4.9 (of 11) risk factors [3]. However, for certain factors, adolescents' recognition was higher than among adults and younger adults (18–24 years) [3]: smoking (88% versus 85%/84%, respectively), being overweight (58% versus 49%/54%), alcohol consumption (47% versus 25%/37%), HPV infection (31% versus 22%/19%) and low levels of physical activity (26% versus 22%/19%).

Our study showed that a cancer-specific intervention raised awareness of cancer risk factors. Two weeks after the intervention, adolescents recognized on average 5.7 (of 11) cancer risk factors, which is greater than British adults (4.9) [3]. Awareness of 9 (of 11) cancer risk factors increased after the intervention. Moreover, with the exception of second-hand smoke, awareness of every risk factor was higher among adolescents after the intervention than adults and younger (18–24 years) adults [3]. In the control school, the mean number of cancer risk factors recognized decreased, and there were decreases in recognition for six individual risk

factors. Brief face-to-face presentations by experienced cancer educators are, therefore, an effective way to increase adolescents' awareness of cancer risk factors. However, raising awareness of the association with second-hand smoke may need further targeted intervention.

Intervention effect was greater among females. The intervention reduced gender disparity in recognition for certain cancer risk factors (i.e. second-hand smoke, older age, red meat, physical activity). After the intervention, statistically significant gender differences in recognition remained only for family history and HPV infection, which was higher among females.

Despite legislation prohibiting sunbed use among adolescents [20, 21], 1 in 10 in our study reported using sunbeds, and females who used sunbeds were already significantly more likely to agree that sun exposure was a cancer risk factor than females who did not. After the intervention, there were greater increases in awareness that sun exposure increased cancer risk among sunbed users than non-sunbed users. In research with college students in the United States (82% aged 17–22, 70% female), 91% of current sunbed users agreed that sunbed use increased skin cancer risk [22]. Our study demonstrates a similar relationship between risk awareness and risk behaviour among younger adolescents (aged 11–17). Sunbed use before the age of 35 increases the risk of malignant melanoma by 75%, and a national prevalence study of adolescents (aged 11–17) in the United Kingdom found that females were significantly more likely to use or intend to use sunbeds [23]. An increasing skin cancer incidence is of particular concern in the United Kingdom where incidence of malignant melanoma is rising more rapidly than for any other cancer [23]. Moreover, it is estimated that 82% of melanoma cases in men and 90% in women are linked to excess exposure to solar radiation and that these proportions are greater at younger ages [24]. Therefore, increasing awareness of skin cancer risk associated with indoor and outdoor ultraviolet (UV) exposure and encouraging sunsafe behaviours are a public health priority [25–27]. Reaching adolescents with

messages regarding the increased skin cancer risk associated with UV exposure may establish patterns of protective behaviour across the life course [10, 28].

An unexpected finding was a significant decrease after the intervention in the number of smokers who recognized smoking as a known cancer risk factor. Although this finding should be treated with caution due to the small number of smokers in intervention schools ( $n=22$ ), it suggests that further research is warranted as it may be that adolescent smokers and non-smokers respond to cancer awareness messages differently.

There are known limitations to the effectiveness of education only interventions to change HRBs [29, 30]. Confirming previous research [22, 31], our study suggests that legislation and awareness-raising interventions are alone not sufficient to address adolescents' cancer risk behaviours. Therefore, multi-component interventions are required that incorporate education about known cancer risk factors and also include changes to the school environment (e.g. routine provision of sun protection cream or hats) and direct challenges to societal and individual attitudes (e.g. towards tanned skin [32] and associated peer pressure to have a tan, particularly prevalent among female adolescents [6]).

However, there is an increasing recognition that changing knowledge is important alongside interventions to change HRBs and that despite inclusion of education in multi-component interventions, educational components are rarely evaluated [33]. Therefore, this study has established a foundation for both the future development and integration of this educational intervention in multi-component programmes and further research to assess the relationship between increased knowledge of cancer risk factors and HRB change.

### Strengths and limitations

To our knowledge, this is the largest study of adolescents' awareness of cancer risk factors conducted in the United Kingdom. It is novel because it concurrently assesses recognition of several known cancer risk factors and examines associations

between awareness and linked HRBs. Previous studies have tended to examine one risk factor and associated behaviour in isolation [11–14].

However, our study has a number of limitations. First, non-probabilistic sampling restricts the ability to make population inferences from cross-sectional analyses. Inclusion of schools with an existing relationship with Teenage Cancer Trust could have introduced selection bias as students in these schools may have higher baseline levels of cancer awareness or be more receptive to cancer awareness messages due to teacher enthusiasm or reinforcement. Second, the composition of the control school, particularly the younger age of students, limited evaluation of intervention effect by age and ethnicity. This was a further consequence of the sampling approach that was selected pragmatically to facilitate both the first cross-sectional study of adolescents' cancer awareness in the United Kingdom [15] and the initial evaluation of the effectiveness of an existing educational intervention delivered by Teenage Cancer Trust to inform the development of future larger-scale school-based intervention studies. Finally, the study design did not incorporate randomization, and clustering by school was not controlled.

Future research is needed to address these study limitations. A larger cross-sectional study is required that uses a nationally representative sample of adolescents supplemented by quota sampling of ethnic groups in accordance with established CAM practice [34] to definitively determine levels of adolescents' cancer awareness in the United Kingdom. Further intervention studies involving greater numbers of students and schools (without prior relationships with Teenage Cancer Trust) are also needed to address the limitations introduced by the sampling approach. This would also enable sub-group analysis by age, ethnicity and HRBs (e.g. to re-test the contentious finding from this study around decreased reported awareness of smoking as a cancer risk factor among smokers). These studies should include additional sociodemographic variables that may influence adolescents' awareness of cancer risk factors [e.g. socioeconomic status (derived from parent's/carer's occupation) [3], educational attainment, school ethos and family

and friends' HRBs]. In addition, future research should consider examining environmental factors, such as school and community health promotion campaigns, as potential confounders. Intervention studies would be strengthened through the use of experimental designs and multivariate analysis that will enable assessment of the relationship among these individual-, school- and network-level variables adjusted for clustering by school. Therefore, future studies should use a cluster randomized controlled trial design.

---

### Conclusions

---

Our study showed that, with the exception of smoking, adolescents' awareness of cancer risk factors was low. An hour-long cancer-specific educational intervention was effective in raising adolescents' awareness of cancer risk factors, especially among females. However, adolescents' awareness of certain cancer risk factors varied after the intervention when examined by linked HRBs (i.e. sun exposure and sunbed use), and there were unexpected consequences of the delivery of intervention delivery (e.g. among smokers) that warrant further investigation. Thus, this intervention requires refinement followed by further evaluation using experimental designs to definitively determine its effectiveness.

---

### Acknowledgements

---

We are grateful to the adolescents who completed the questionnaires, and parents and teachers for their support for the research. We also thank Petra Rauchhaus (University of Dundee) for her statistical review of the manuscript. Data collected for the purposes of this study are available through the UK Data Archive in accordance with the conditions of use of the CAM.

---

### Funding

---

This independent study was funded by Teenage Cancer Trust which played no part in data

collection, analysis or interpretation, or drafting and revising the manuscript.

---

### Conflict of interest statement

---

None declared.

---

### References

---

1. Sanderson SC, Waller J, Jarvis MJ *et al.* Awareness of lifestyle factors for cancer and heart disease among adults in the UK. *Patient Educ Couns* 2009; **74**: 221–7.
2. Peto R. The fraction of cancer attributable to lifestyle and environmental factors in the UK in 2010. *Br J Cancer* 2011; **105**: S1.
3. University College London (UCL). *Public Awareness of Cancer in Britain: Report for the National Awareness and Early Diagnosis Initiative*. London: UCL, 2009.
4. CR-UK. Cancer Incidence by Age—UK Statistics. Available at: <http://info.cancerresearchuk.org/cancerstats/incidence/age/>. Accessed: 24 April 2012.
5. Brooks F, Magnusson J, Klemmer E *et al.* *Health Behaviour in School-aged Children (HBSC) England National Report*. Hatfield, UK: Centre for Research in Primary and Community Care (CRIPACC) University of Hertfordshire, 2011.
6. Kasparian NA, McLoone JK, Meiser B. Skin cancer-related prevention and screening behaviours: a review of the literature. *J Behav Med* 2009; **32**: 406–28.
7. Wardle J, Jarvis MJ, Steggle N *et al.* Socioeconomic disparities in cancer-risk behaviors in adolescence: baseline results from the Health and Behaviour in Teenagers Study (HABITS). *Prev Med* 2003; **36**: 721–30.
8. Jansse E, van Osch L, de Vries H *et al.* Measuring risk perceptions of skin cancer: reliability and validity of different operationalizations. *Brit J Health Psych* 2011; **16**: 92–112.
9. Larsman P, Eklöf M, Törner M. Adolescents' risk perception in relation to risk behaviour with long-term health consequences; antecedents and outcomes: a literature review. *Safety Sci* 2012; **50**: 1740–8.
10. Due P, Krølner R, Rasmussen M *et al.* Pathways and mechanisms in adolescence contribute to adult health inequalities. *Scand J Public Health* 2011; **39**: 62–78.
11. Suppa M, Cazzaniga S, Fargnoli MC *et al.* Knowledge, perceptions and behaviours about skin cancer and sun protection among secondary school students from Central Italy. *J Eur Acad Dermatol* 2013; **27**: 571–9.
12. Saridi M, Toska A, Pappa V *et al.* Knowledge, attitudes and self care practices related to sun protection among teenagers in Greece. *Arch Hellenic Med* 2009; **26**: 355–65.
13. Karayurt Ö, Özmen D, Çetinkaya AÇ. Awareness of breast cancer risk factors and practice of breast self examination among high school students in Turkey. *BMC Public Health* 2008; **8**: 359.
14. Agius PA, Pitts MK, Smith AMA *et al.* Human papillomavirus and cervical cancer: Gardasil® vaccination status and

- knowledge amongst a nationally representative sample of Australian secondary school students. *Vaccine* 2010; **28**: 4416–22.
15. Kyle RG, Forbat L, Hubbard G. Cancer awareness among adolescents in Britain: a cross-sectional study. *BMC Public Health* 2012; **12**: 580.
  16. Currie C, Levin K, Kirkby J *et al.* *Health Behaviour in School-Aged Children (HBSC) Scotland National Report Child and Adolescent Health Research Unit (CAHRU)*. Edinburgh: The University of Edinburgh, 2011.
  17. Scottish Executive. *A Curriculum for Excellence*. Edinburgh: Scottish Executive, 2004.
  18. Department for Education. *Personal, Social, Health and Economic Education (PSHEE)*, 2011. Available at: <http://www.education.gov.uk/schools/teachingandlearning/curriculum/secondary/b00198880/pshee>. Accessed: 24 April 2013.
  19. Cancer Research UK (CR-UK). *Cancer Awareness Measure Toolkit V2.1*. London: CR-UK, 2011.
  20. Her Majesty's Stationery Office (HMSO). *Sunbeds (Regulation) Act 2010*. London: HMSO, 2010.
  21. Her Majesty's Stationery Office (HMSO). *The Public Health etc (Scotland) Act 2008 (Sunbed) Regulations 2009*. London: HMSO, 2010.
  22. Knight JM, Kirincich AN, Farmer ER *et al.* Awareness of the risks of tanning lamps does not influence behaviour among college students. *Arch Dermatol* 2002; **138**: 1311–5.
  23. Thomson CS, Woolnough S, Wickenden M *et al.* Sunbed use in children aged 11–17 in England: face to face quota sampling surveys in the National Prevalence Study and Six Cities Study. *BMJ* 2010; **340**: c877.
  24. Parkin DM, Mesher D, Sasiemi P. Cancers attributable to solar (ultraviolet) radiation exposure in the UK in 2010. *Br J Cancer* 2011; **105**: S66–S69.
  25. Department of Health (DH). *Cancer Reform Strategy*. London: DH, 2007.
  26. National Institute for Health and Clinical Excellence (NICE). *Skin Cancer: Prevention Using Public Information, Sun Protection Resources and Changes to the Environment (NICE Public Health Guidance 32)*. London: NICE, 2011.
  27. World Health Organisation (WHO). *INTERSUN: The Global UV Project—A Guide and Compendium*. Geneva, Switzerland: WHO, 2003.
  28. Andreeva VA, Reynolds KD, Buller DB *et al.* Concurrent psychosocial predictors of sun safety among middle school youth. *J Sch Health* 2008; **78**: 374–81.
  29. Stewart-Brown SL. *What Is the Evidence on School Health Promotion in Improving Health or Preventing Disease and, Specifically What Is the Effectiveness of the Health Promoting Schools Approach?* Copenhagen: WHO Health Evidence Network (HEN), 2006.
  30. Jackson CA, Henderson M, Frank JW *et al.* An overview of prevention of multiple risk behaviour in adolescence and young adulthood. *J Public Health* 2012; **34**(S1): i31–i40.
  31. Sjöberg L, Holm L-E, Ullén H *et al.* Tanning and risk perception in adolescents. *Health Risk Soc* 2004; **6**: 81–94.
  32. Hedges T, Scriven A. Young park users' attitudes and behaviour to sun protection. *Global Health Promotion* 2010; **17**: 24–31.
  33. Jepson RG, Harris FM, Platt S *et al.* The effectiveness of interventions to change six health behaviours: a review of reviews. *BMC Public Health* 2010; **10**: 538.
  34. Waller J, Robb K, Stubbings S *et al.* Awareness of cancer symptoms and anticipated help seeking among ethnic minority groups in England. *Br J Cancer* 2009; **101**: S24–30.
